# Supplementary material
Source: Research Square preprint supplement (doi:10.21203/rs.3.rs-9349679/v1)
Supplement: Supplementary file 1 [file 812bf4ba5a8c5035682fd127.docx]

**Breakout Session Discussion Guide**

1. Please, subject the key findings and analysis to critical scrutiny to determine their factual accuracy.
2. Examine the conclusions to determine their validity and soundness
3. Examine the recommendations to determine their feasibility and appropriateness.

**1.0 Key Findings**

**1.1 Coordination**

- Inadequate funds for technical officers at the RCC to perform oversight responsibilities and provide backstopping support to the DoA.
- Reporting challenges due to disparities in the reporting template, indicators, and timelines.
- The actions of some development partners undermine the decentralization process.
- Inadequate funding hinders the operations of the DPCU to provide effective policy implementation and coordination.
- Inadequate logistics is a major challenge affecting the performance of the DPCU.
- The effectiveness of the DPCU is contingent on the performance of the various departments of the Assembly to ensure that the DPCU has quality data to work with.
- Future organization of consultative review/planning workshops by DoA without MAG funding is unclear.

**1.2 Funding & Budget**

- Insufficient Internally Generated Funds (IGF) mobilization.
- Insufficient and irregular release of the District Assembly Common Fund (DACF).
- The DACF is often undermined by its diversion to support various central government expenditures and initiatives.
- The Department of Agriculture does not benefit from the DDF which prioritises Education and Health.
- The exclusion of food security as a critical indicator of the Basic Needs Approach used in the formula for the distribution of the DACF may be an aberration.

**1.3 Planning & Implementation**

- Inadequate staffing to implement critical activities and responsibilities at the Department of Agriculture.
- Setbacks in staff recruitment into the Local Government Service have implications for quality extension service delivery.
- Inadequate logistical constraints affect staff performance and morale.
- There is widespread dissatisfaction with the state of participation in decision-making platforms to promote ownership and accountability (i.e Town Hall meetings, Area Council meetings, and Agric review/planning workshops).

**1.4 Cross cutting**

- Some Local Government staff have not internalized the institutional shift from central government to local Assembly, amidst a lack of appreciation of the civil service organogram.
- Inadequate capacity and structural issues render sub-district structures practically invisible.
- Creation of new local authorities without due recourse to available resources is a major challenge.
- Lack of formal spaces to mainstream local governance structures for both traditional authorities and Civil Society Organizations to engage with MMDAs.
- Lack of formal spaces for private sector actors to engage with MMDAs to foster an enabling business environment to increase commercialization and profitability.

**2.0 Conclusions**

1. Insufficient and irregular flow of funds through the IGF and DACF poses challenges for MMDAs to allocate funds towards engaging sub-district structures in agricultural development planning, design, and management.
2. The government's flagship programs such as PJF, the source deductions from the DACF for central government expenditures, and the activities of certain donors and development partners seem to hinder the decentralization process and efforts.
3. Inadequate local participation will hinder accountability, policy implementation, and coordination necessary for sustainable local economic development.
4. The apparent discordance between some of the DDAs and the Assemblies may be attributed to individual actors involved rather than a systemic challenge.

**3.0 Suggested Recommendations**

1. **The District Assemblies should promote Local Economic Development** by forging partnerships with the private sector and civil society to harness and accelerate the economic potentials of the districts and strengthen the competitiveness of the local private sector.
2. **The District Assemblies should leverage digital innovations to improve Internally Generated Funds (IGF)** to deal with revenue leakages, enforcing tax laws, maintaining robust data of revenue sources in the district and implementing effective monitoring systems.
3. **Government should ensure regular and timely disbursement of funds to the DACF** to facilitate efficient functioning of the District Assemblies.
4. **The DACF Administrator should review the formula for sharing the DACF** by incorporating food security as a critical indicator within the "Basic Needs" approach to development.
5. **Development partners should facilitate the establishment of public/private dialogue (PPD) platforms** to promote good governance, foster a conducive business environment, and stimulate an entrepreneurial ecosystem.
6. **The Parliament of Ghana should impose moratorium on the creation of new districts** until existing local governments are adequately staffed and financed to provide improved services.
7. **Development partners should leverage pre-existing coordination structures** to strengthen coordination mechanisms at the Assemblies.
8. **The District Assemblies are encouraged to explore efficient ways to promote popular participation** through civic education to reinforce citizens' awareness of their civic rights.
