# Supplementary material
Source: Research Square preprint supplement (doi:10.21203/rs.3.rs-9349679/v1)
Supplement: Supplementary file 2 [file b24ff6a55b7cf02a5beb3e11.docx]

**Interview Guide**

**Strengthening Decentralization in the Agricultural Sector for Effective Policy Implementation and Coordination**

**Political Decentralization**

- How does the RCC perform its supervisory and backstopping function of the District Assemblies?

- What are the challenges in performing your oversight responsibilities?

- How can these be addressed?

- What are the communication mechanisms between the national and local government entities? Does the national government provide sufficient information and advice? What information or advice is lacking? Are there effective means for feedback and requests (information, resources, etc.) from the district level to regional and national levels?

- Under which sub-committee is the Department of Agriculture classified? Which are the other Departments in that cluster?

- Does the sub-committee of which the Department of Agriculture is a member, affect the functions and business of the Department of Agriculture? If yes, how?

- In which ways can the issues (if any) be addressed?

- In what ways are Unit Committee members involved in decision making and project implementation at the district level?

- As part of the Sub-District structure of the District Assembly, what is your role as a Unit Committee member?

- What are the challenges Unit Committee members face in promoting grassroot participation in local governance and development?

- In which ways can Unit Committee members support community mobilization for agricultural programmes and activities?

**District Development Planning & Co-ordination**

- Are there any constraints in using the National Development Planning Commission’s (NDPC) planning guidelines in your district?

- Does the District Assembly link its development plans to the composite budget?

- What is the composition of the District Planning Co-ordinating Unit (DPCU)?

- How regular does the DPCU hold meetings?

- What factors affect effective functioning of the DPCU?

- What is required to make the DPCU perform it’s co-ordination role effectively?

- How does the DPCU ensure inclusiveness and participation of key stakeholders during the planning process.

- What is the relationship between the Regional Planning Coordinating Unit (RPCU) and the District Planning Coordinating Unit (DPCU)?

- What are the synergies and challenges?

- Aside from the town, Area and Zonal Councils and Unit committees, are there other grassroots associations involved in planning processes?
- If yes, What is the frequency of their participation? i. Monthly ii. Bimonthly iii. Quarterly iv. Semi – annually v. Annually vi. Need based (ad hoc)
- When was the last meeting with these stakeholders held? (probe for prove)
- What is the composition of the groups/committee(s)/cooperatives?
- Specific to the agricultural sub-sector, how does the DA incorporate the needs of actors in planning?
- Do you hold regular meetings with Agricultural value chain Actions? i. Yes ii. No iii. Not Really (probe for prove)
- What is the level of engagement of the various value chain actors? (No elected/nominated assembly members)
- How does the assembly coordinate activities of the various value chain actors in the districts?
- How effective are the current coordination mechanisms of the value chain actors?
- What recommendations will you give to non-state actors interested in facilitating Public – Private Dialogue between the assembly and the value chain actors?

**Fiscal Decentralization**

- Which are the MoFA/National programmes being implemented in the district and how are they funded (i.e. fund transfers through which channel)?

- Under what circumstance does the Executive Committee undertake budget cuts or re-prioritization and how are the affected Department(s) involved in the decision? How does this impact decentralization of regulation and service provision?

- In which way is the composite budgeting process impeding the business of the Department of Agriculture?

- Which are the various central government commitments born by the DACF?

- What are the challenges with the composite budgeting and budget execution? How do they impact decentralization of regulation and services?

-In which ways does central government exercise interference, expenditure control, awarding of contracts, setting development/project priorities?

- Any challenges with the DDF??

**Administrative Decentralization**

- Has the Local Government Service been decentralized and given a department status at the District Assembly to perform it’s HR role?

- Are there plans to role out training programmes to help staff internalize the institutional shift and instil appropriate professional behaviour and attitudinal change among staff?

-What challenges are being encountered by the departments?

- What mechanisms will better facilitate pro-activeness of the Director of Agriculture to advocate or sell agricultural programmes, and the DCE, to become cognisant of agricultural activities in the District Assembly?

**Participation in local governance**

- What are the challenges associated with stakeholder participation in the District development plans and budget hearings?

- How can it be improved to make it effective to achieve the desired outcomes?

- Department of Agriculture planning process (consultative planning and review workshop; sub-district mini plans???)
